# Supplementary material
Source: PubMed Central journal article supplement (PMC7749711)
Supplement: NIHMS1652251-supplement-Figure_S1__Tables_S1_S3__S5.pdf [file NIHMS1652251-supplement-Figure_S1__Tables_S1_S3__S5.pdf]

## Supplementary Data

### **Identification of molecular targets of dietary grape-mediated chemoprevention of ultraviolet B skin carcinogenesis: *A comparative quantitative proteomics analysis***

Charlotte A. Mintie, BS<sup>1\*</sup>, Chandra K. Singh, Ph D<sup>1\*</sup>, Mary A. Ndiaye, BS<sup>1</sup>, Gregory A Barrett-Wilt, Ph D<sup>2</sup>, Nihal Ahmad, Ph D<sup>1,3</sup>

Affiliation of authors:

<sup>1</sup> Department of Dermatology, University of Wisconsin, Madison, Wisconsin, 53706, USA;

<sup>2</sup> Biotechnology Center, University of Wisconsin, Madison, WI, 53706, USA,

<sup>3</sup> William S. Middleton VA Medical Center, Madison, Wisconsin, 53705, USA

\*Contributed equally

Correspondence to:

Nihal Ahmad, Ph D., Department of Dermatology, University of Wisconsin, Medical Sciences Center, 1300 University Avenue, Madison, Wisconsin, 53706

Phone: (608) 263-2532; Fax: (608) 263-5223; E-mail: nahmad@wisc.edu

Keywords: grape, non-melanoma skin cancers, chemoprevention, proteomics

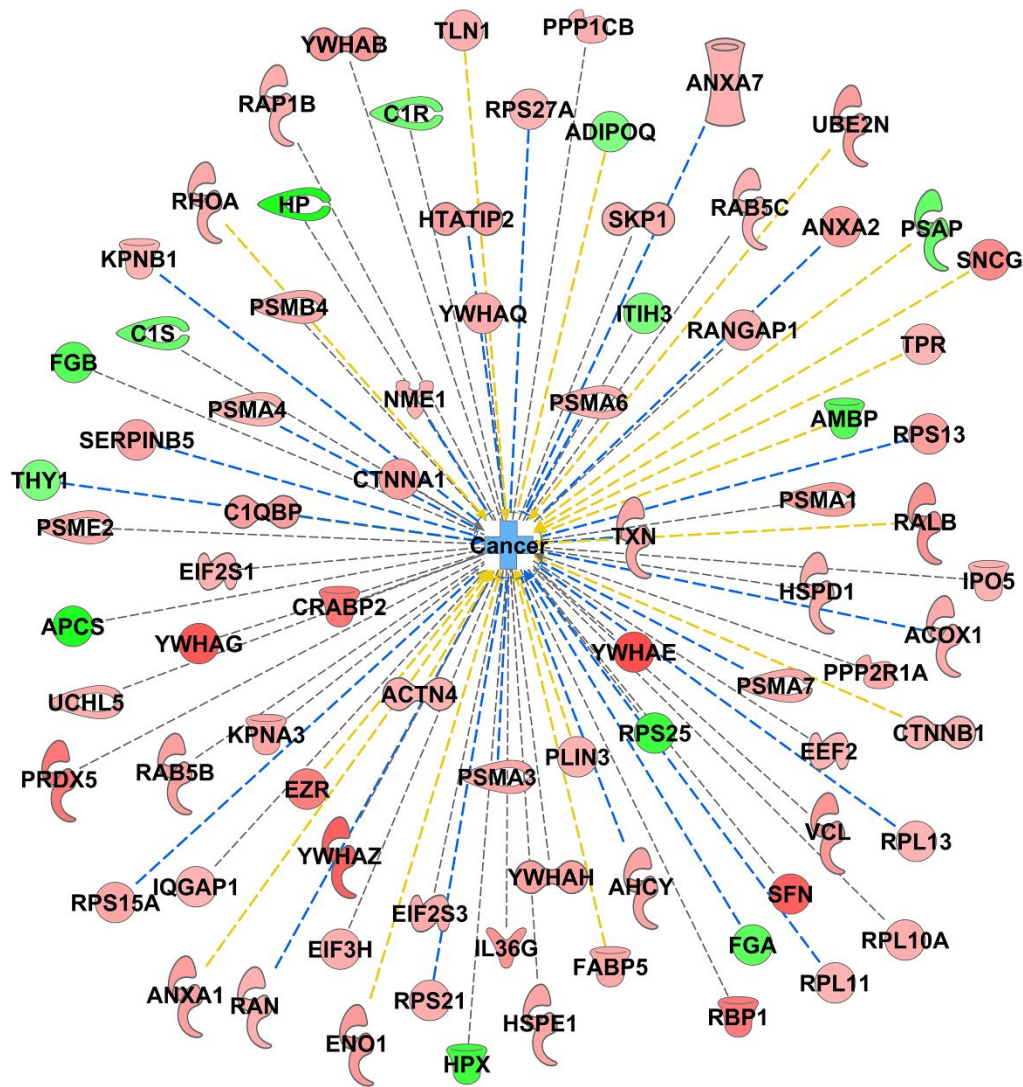

**Supplementary Figure S1:** Functional analysis of the secondary cut-off analysis utilizing IPA (5% GP / Ctl) show interactions of proteins which act to inhibit cancer. Indirect interactions are denoted by dashed lines. Blue lines suggest inhibition; orange suggest activation; yellow suggest inconsistent findings; grey indicates that an effect is not predicted. Fold change of protein expression 5% GP / Ctl is indicated by green=downregulated, red=upregulated. IPA, Ingenuity Pathway Analysis. GP, grape powder. Ctl, control diet.

**Supplementary Table S1: Adjustment of TMT-labeled samples**

## Test Pool 1

| <b>TMT reagent</b> | <b>Normalization to minimum reporter ion</b> | <b>Volume to add</b> | <b>Digest mass added</b> |
|--------------------|----------------------------------------------|----------------------|--------------------------|
| 126                | 1                                            | 87                   | 24.4                     |
| 127N               | 0.81                                         | 70.4                 | 19.8                     |
| 127C               | 0.58                                         | 50.1                 | 14.1                     |
| 128N               | 0.74                                         | 64.4                 | 18.1                     |
| 128C               | 0.84                                         | 73.6                 | 20.7                     |
| 129N               | 0.73                                         | 63.2                 | 17.8                     |
| 129C               | 0.9                                          | 78.6                 | 22.1                     |
| 130N               | 0.59                                         | 51.7                 | 14.5                     |
| 130C               | 0.93                                         | 81.1                 | 22.8                     |
| 131                | 0.98                                         | 84.8                 | 23.8                     |
|                    |                                              | Total mass:          | 198.0 µg                 |

## Test Pool 2 semi-normalization

| <b>TMT reagent</b> | <b>Normalization to maximum reporter ion</b> | <b>Volume to add (87 µL maximum)</b> | <b>Digest mass added</b> |
|--------------------|----------------------------------------------|--------------------------------------|--------------------------|
| 126                | 0.48                                         | 87                                   | 24.4                     |
| 127N               | 1.11                                         | 78.4                                 | 22                       |
| 127C               | 1.65                                         | 52.7                                 | 14.8                     |
| 128N               | 1.22                                         | 71.4                                 | 20.1                     |
| 128C               | 0.88                                         | 87                                   | 24.4                     |
| 129N               | 0.98                                         | 87                                   | 24.4                     |
| 129C               | 0.93                                         | 87                                   | 24.4                     |
| 130N               | 1                                            | 87                                   | 24.4                     |
| 130C               | 0.9                                          | 87                                   | 24.4                     |
| 131                | 0.65                                         | 87                                   | 24.4                     |
|                    |                                              | Total mass:                          | 228.1 µg                 |

**Supplementary Table S2:** HPLC gradients for a) offline fractionation and b) LC/MS/MS

a.

| <b>Time</b> | <b>%B</b> |
|-------------|-----------|
| 0           | 0         |
| 2           | 0         |
| 3           | 5         |
| 23          | 60        |
| 25          | 100       |
| 26          | 100       |
| 27          | 0         |
| 36          | 0         |

b.

| <b>Time (min)</b> | <b>%B</b> | <b>Flow (uL/min)</b> |
|-------------------|-----------|----------------------|
| 0                 | 0         | 0.5                  |
| 29                | 0         | 0.5                  |
| 30                | 0         | 0.3                  |
| 31                | 3         | 0.3                  |
| 185               | 30        | 0.3                  |
| 195               | 50        | 0.3                  |
| 202               | 95        | 0.3                  |
| 203               | 95        | 0.3                  |
| 207               | 0         | 0.3                  |
| 208               | 0         | 0.3                  |
| 210               | 0         | 0.5                  |
| 230               | 0         | 0.5                  |

**Supplementary Table S3: Antibodies used for immunoblotting**

| <b>Gene Name</b>       | <b>Supplier</b> | <b>Catalog Number</b> | <b>Dilution</b> | <b>Molecular Weight (kDa)</b> |
|------------------------|-----------------|-----------------------|-----------------|-------------------------------|
| PSMA3                  | Proteintech     | 11887                 | 1:500           | 28                            |
| PSMA6                  | Proteintech     | 11573                 | 1:1000          | 28                            |
| PSMB7                  | Abclonal        | A14771                | 1:1000          | 30                            |
| UCHL5                  | Proteintech     | 11527                 | 1:500           | 38                            |
| APCS                   | Abclonal        | A1996                 | 1:500           | 30                            |
| Haptoglobin            | Proteintech     | 16665                 | 1:500           | 42                            |
| Fibrinogen alpha chain | Proteintech     | 20645                 | 1:1000          | 60                            |
| Fibrinogen beta chain  | Proteintech     | 16747                 | 1:1000          | 50                            |
| AMBP                   | Abclonal        | A1846                 | 1:500           | 46                            |
| pERK1/2                | Cell Signaling  | 9101                  | 1:1000          | 42, 44                        |
| ERK1/2                 | Cell Signaling  | 9102                  | 1:1000          | 42, 45                        |
| NF- $\kappa$ B         | Invitrogen      | 510500                | 1:500           | 65                            |
| I $\kappa$ B $\alpha$  | Cell Signaling  | 9242                  | 1:1000          | 39                            |
| B-Tubulin              | Proteintech     | 10094                 | 1:1000          | 55                            |
| $\beta$ -Actin         | Cell Signaling  | 4970, 3700            | 1:1000          | 45                            |

**Supplementary Table S5:** Protein cut-off. A primary dataset (marked with X in ‘FDR cut-off’ section) was created by subjecting the 2,629 proteins to cut-off criteria:  $\geq 3$  unique peptides, fold change (5% GP / Control)  $\geq 1.2$ , p-value  $\leq 0.05$ , and q-value of  $\leq 0.1$ . A secondary dataset that includes all the proteins presented in this table was created excluding the FDR-calculated q-value.

| UniProt ID                  | Gene names | Protein names                                                     | Unique peptides | Ratio | Fold Change | FDR cut-off |
|-----------------------------|------------|-------------------------------------------------------------------|-----------------|-------|-------------|-------------|
| <b>Ubiquitin Proteasome</b> |            |                                                                   |                 |       |             |             |
| Q9R1P4                      | PSMA1      | Proteasome subunit alpha type-1                                   | 10              | 1.58  | 1.58        | X           |
| O70435                      | PSMA3      | Proteasome subunit alpha type-3                                   | 14              | 1.43  | 1.43        | X           |
| Q9R1P0                      | PSMA4      | Proteasome subunit alpha type-4                                   | 10              | 1.23  | 1.23        | X           |
| Q9QUM9                      | PSMA6      | Proteasome subunit alpha type-6                                   | 13              | 1.29  | 1.29        | X           |
| Q9Z2U0                      | PSMA7      | Proteasome subunit alpha type-7                                   | 9               | 1.35  | 1.35        |             |
| P99026                      | PSMB4      | Proteasome subunit beta type-4                                    | 6               | 1.36  | 1.36        | X           |
| P70195                      | PSMB7      | Proteasome subunit beta type-7                                    | 5               | 1.28  | 1.28        | X           |
| Q9WUP7                      | UCHL5      | Ubiquitin carboxyl-terminal hydrolase isozyme L5                  | 4               | 1.31  | 1.31        | X           |
| P97372                      | PSME2      | Proteasome activator complex subunit 2                            | 3               | 1.39  | 1.39        |             |
| P62983                      | RPS27A     | Ubiquitin-40S ribosomal protein S27a                              | 8               | 1.21  | 1.21        |             |
| P63038                      | HSPD1      | 60 kDa heat shock protein, mitochondrial                          | 30              | 1.35  | 1.35        |             |
| Q64433                      | HSPE1      | 10 kDa heat shock protein, mitochondrial                          | 7               | 1.44  | 1.44        |             |
| Q9WTX5                      | SKP1       | S-phase kinase-associated protein 1                               | 7               | 1.24  | 1.24        |             |
| P61089                      | UBE2N      | Ubiquitin-conjugating enzyme E2 N                                 | 6               | 1.58  | 1.58        |             |
| <b>Acute Phase Response</b> |            |                                                                   |                 |       |             |             |
| Q07456                      | AMBP       | Alpha-1-microglobulin                                             | 9               | 0.61  | -1.65       |             |
| P12246                      | APCS       | Serum amyloid P-component                                         | 8               | 0.30  | -3.37       |             |
| Q8CG16                      | C1RA       | Complement C1r-A subcomponent                                     | 4               | 0.73  | -1.38       |             |
| Q8CG14                      | C1S1       | Complement C1s-A subcomponent                                     | 4               | 0.70  | -1.43       |             |
| E9PV24                      | FGA        | Fibrinogen alpha chain                                            | 27              | 0.63  | -1.58       |             |
| Q8K0E8                      | FGB        | Fibrinogen beta chain                                             | 37              | 0.62  | -1.63       |             |
| Q61646                      | HP         | Haptoglobin                                                       | 20              | 0.46  | -2.17       |             |
| Q91X72                      | HPX        | Hemopexin                                                         | 33              | 0.54  | -1.85       |             |
| Q3U0P4                      | IL36G      | Interleukin-36 gamma                                              | 3               | 1.72  | 1.72        |             |
| Q61704                      | ITIH3      | Inter-alpha-trypsin inhibitor heavy chain H3                      | 15              | 0.80  | -1.25       |             |
| Q9JIW9                      | RALB       | Ras-related protein Ral-B                                         | 4               | 1.76  | 1.76        | X           |
| Q99JI6                      | RAP1B      | Ras-related protein Rap-1b                                        | 5               | 1.32  | 1.32        |             |
| Q00915                      | RBP1       | Retinol-binding protein 1                                         | 4               | 2.14  | 2.14        | X           |
| <b>Other Proteins</b>       |            |                                                                   |                 |       |             |             |
| O70456                      | SFN        | 14-3-3 protein sigma                                              | 17              | 2.56  | 2.56        |             |
| Q9CQV8                      | YWHAB      | 14-3-3 protein beta/alpha                                         | 5               | 1.64  | 1.64        |             |
| P62259                      | YWHAE      | 14-3-3 protein epsilon                                            | 13              | 2.83  | 2.83        |             |
| P61982                      | YWHAG      | 14-3-3 protein gamma;14-3-3 protein gamma, N-terminally processed | 4               | 2.68  | 2.68        |             |
| P68510                      | YWHAH      | 14-3-3 protein eta                                                | 5               | 1.46  | 1.46        |             |
| P68254                      | YWHAQ      | 14-3-3 protein theta                                              | 7               | 1.32  | 1.32        |             |
| P63101                      | YWHAZ      | 14-3-3 protein zeta/delta                                         | 10              | 2.54  | 2.54        |             |
| Q9D2R0                      | AACS       | Acetoacetyl-CoA synthetase                                        | 11              | 1.20  | 1.20        |             |
| Q6P542                      | ABCF1      | ATP-binding cassette sub-family F member 1                        | 6               | 1.23  | 1.23        |             |
| Q91V12                      | ACOT7      | Cytosolic acyl coenzyme A thioester hydrolase                     | 6               | 1.27  | 1.27        |             |
| Q9R0H0                      | ACOX1      | Peroxisomal acyl-coenzyme A oxidase 1                             | 5               | 1.35  | 1.35        |             |
| Q9Z2N8                      | ACTL6A     | Actin-like protein 6A                                             | 7               | 1.29  | 1.29        |             |
| P57780                      | ACTN4      | Alpha-actinin-4                                                   | 21              | 1.23  | 1.23        |             |
| P03958                      | ADA        | Adenosine deaminase                                               | 3               | 1.43  | 1.43        |             |
| Q60994                      | ADIPOQ     | Adiponectin                                                       | 4               | 0.83  | -1.21       |             |
| P46664                      | ADSS       | Adenylosuccinate synthetase isozyme 2                             | 10              | 1.25  | 1.25        |             |
| P50247                      | AHCY       | Adenosylhomocysteinase                                            | 19              | 1.47  | 1.47        | X           |
| A2AS37                      | AI182371   |                                                                   | 3               | 0.71  | -1.40       |             |

|        |          |                                                                      |    |      |       |   |
|--------|----------|----------------------------------------------------------------------|----|------|-------|---|
| Q9JII6 | AKR1A1   | Alcohol dehydrogenase [NADP(+)]                                      | 13 | 1.32 | 1.32  |   |
| P45376 | AKR1B1   | Aldose reductase                                                     | 13 | 1.46 | 1.46  |   |
| P45377 | AKR1B8   | Aldose reductase-related protein 2                                   | 4  | 1.33 | 1.33  |   |
| P10518 | ALAD     | Delta-aminolevulinic acid dehydratase                                | 4  | 1.28 | 1.28  |   |
| P10107 | ANXA1    | Annexin A1                                                           | 26 | 1.54 | 1.54  |   |
| P07356 | ANXA2    | Annexin A2                                                           | 24 | 1.60 | 1.60  |   |
| Q3TET3 | ANXA3    | Annexin A3                                                           | 11 | 1.40 | 1.40  |   |
| P48036 | ANXA5    | Annexin A5                                                           | 15 | 3.05 | 3.05  |   |
| Q07076 | ANXA7    | Annexin A7                                                           | 13 | 1.27 | 1.27  |   |
| Q921D0 | ANXA8    | Annexin A8                                                           | 18 | 1.64 | 1.64  | X |
| P51910 | APOD     | Apolipoprotein D                                                     | 4  | 0.72 | -1.38 |   |
| Q99PT1 | ARHGDI A | Rho GDP-dissociation inhibitor 1                                     | 10 | 1.38 | 1.38  |   |
| Q61599 | ARHGDI B | Rho GDP-dissociation inhibitor 2                                     | 7  | 1.62 | 1.62  |   |
| Q9CQW2 | ARL8B    | ADP-ribosylation factor-like protein 8B                              | 3  | 1.30 | 1.30  |   |
| Q61024 | ASNS     | Asparagine synthetase [glutamine-hydrolyzing]                        | 15 | 1.24 | 1.24  |   |
| Q09PK2 | ASPRV1   | Retroviral-like aspartic protease 1                                  | 4  | 2.10 | 2.10  |   |
| Q9CY64 | BLVRA    | Biliverdin reductase A                                               | 6  | 1.24 | 1.24  |   |
| Q9CQC6 | BZW1     | Basic leucine zipper and W2 domain-containing protein 1              | 4  | 1.51 | 1.51  | X |
| Q8R5L1 | C1QBP    | Complement component 1 Q subcomponent-binding protein, mitochondrial | 5  | 1.53 | 1.53  |   |
| Q8K182 | C8A      | Complement component C8 alpha chain                                  | 6  | 0.75 | -1.33 |   |
| Q9D6N1 | CA13     | Carbonic anhydrase 13                                                | 5  | 1.38 | 1.38  |   |
| P62204 | CALM1    | Calmodulin                                                           | 5  | 2.57 | 2.57  |   |
| Q9JM83 | CALM4    | Calmodulin-4                                                         | 7  | 2.15 | 2.15  |   |
| P35564 | CANX     | Calnexin                                                             | 25 | 1.43 | 1.43  |   |
| O88456 | CAPNS1   | Calpain small subunit 1                                              | 5  | 1.32 | 1.32  |   |
| Q5RKN9 | CAPZA1   | F-actin-capping protein subunit alpha-1                              | 7  | 1.27 | 1.27  | X |
| P47757 | CAPZB    | F-actin-capping protein subunit beta                                 | 15 | 1.31 | 1.31  | X |
| Q9ER72 | CARS     | Cysteine--tRNA ligase, cytoplasmic                                   | 8  | 1.38 | 1.38  |   |
| O89094 | CASP14   | Caspase-14                                                           | 5  | 1.70 | 1.70  |   |
| Q8K354 | CBR3     | Carbonyl reductase [NADPH] 3                                         | 12 | 1.21 | 1.21  |   |
| P06909 | CFH      | Complement factor H                                                  | 37 | 0.63 | -1.59 |   |
| P18760 | CFL1     | Cofilin-1                                                            | 13 | 1.23 | 1.23  |   |
| Q61362 | CHI3L1   | Chitinase-3-like protein 1                                           | 3  | 1.54 | 1.54  |   |
| P30275 | CKMT1    | Creatine kinase U-type, mitochondrial                                | 5  | 1.36 | 1.36  |   |
| Q9Z1Q5 | CLIC1    | Chloride intracellular channel protein 1                             | 11 | 1.26 | 1.26  | X |
| Q9DBP5 | CMPK1    | UMP-CMP kinase                                                       | 4  | 1.25 | 1.25  |   |
| P61924 | COPZ1    | Coatomer subunit zeta-1                                              | 4  | 1.24 | 1.24  |   |
| Q9CQI6 | COTL1    | Coactosin-like protein                                               | 11 | 1.28 | 1.28  |   |
| P52825 | CPT2     | Carnitine O-palmitoyltransferase 2, mitochondrial                    | 9  | 1.35 | 1.35  |   |
| P22935 | CRABP2   | Cellular retinoic acid-binding protein 2                             | 3  | 2.16 | 2.16  |   |
| P56567 | CSTA     | Cystatin-A;Cystatin-A, N-terminally processed                        | 8  | 1.73 | 1.73  |   |
| Q62426 | CSTB     | Cystatin-B                                                           | 3  | 1.56 | 1.56  |   |
| P26231 | CTNNA1   | Catenin alpha-1                                                      | 10 | 1.50 | 1.50  |   |
| Q02248 | CTNNA1   | Catenin beta-1                                                       | 11 | 1.20 | 1.20  |   |
| Q91YL7 | CWH43    | PGAP2-interacting protein                                            | 3  | 1.30 | 1.30  |   |
| P56395 | CYB5A    | Cytochrome b5                                                        | 3  | 1.45 | 1.45  |   |
| Q9DAR7 | DCPS     | m7GpppX diphosphatase                                                | 4  | 1.34 | 1.34  |   |
| A2ADY9 | DDI2     | Protein DDI1 homolog 2                                               | 6  | 1.36 | 1.36  |   |
| P54823 | DDX6     | Probable ATP-dependent RNA helicase DDX6                             | 8  | 1.37 | 1.37  |   |
| O35290 | EAR3     | Eosinophil cationic-type ribonuclease 3                              | 5  | 0.69 | -1.46 |   |
| O70251 | EEF1B    | Elongation factor 1-beta                                             | 8  | 1.65 | 1.65  |   |
| Q80T06 | EEF1D    | Elongation factor 1-delta                                            | 10 | 1.62 | 1.62  |   |
| P58252 | EEF2     | Elongation factor 2                                                  | 55 | 1.20 | 1.20  |   |
| Q6ZWX6 | EIF2S1   | Eukaryotic translation initiation factor 2 subunit 1                 | 10 | 1.21 | 1.21  |   |

|            |            |                                                                |    |      |       |   |
|------------|------------|----------------------------------------------------------------|----|------|-------|---|
| Q9Z0N1     | EIF2S3X    | Eukaryotic translation initiation factor 2 subunit 3, X-linked | 11 | 1.34 | 1.34  |   |
| Q91WK2     | EIF3H      | Eukaryotic translation initiation factor 3 subunit H           | 5  | 1.30 | 1.30  |   |
| O55135     | EIF6       | Eukaryotic translation initiation factor 6                     | 6  | 1.40 | 1.40  |   |
| P17182     | ENO1       | Alpha-enolase                                                  | 17 | 1.61 | 1.61  |   |
| Q8BGB7     | ENOPH1     | Enolase-phosphatase E1                                         | 3  | 1.24 | 1.24  |   |
| P57759     | ERP29      | Endoplasmic reticulum resident protein 29                      | 5  | 2.57 | 2.57  |   |
| Q9D1Q6     | ERP44      | Endoplasmic reticulum resident protein 44                      | 11 | 1.21 | 1.21  |   |
| Q9D952     | EVPL       | Envoplakin                                                     | 10 | 1.21 | 1.21  |   |
| P26040     | EZR        | Ezrin                                                          | 19 | 2.05 | 2.05  |   |
| P04117     | FABP4      | Fatty acid-binding protein, adipocyte                          | 14 | 1.86 | 1.86  |   |
| Q05816     | FABP5      | Fatty acid-binding protein, epidermal                          | 15 | 1.40 | 1.40  |   |
| Q61554     | FBN1       | Fibrillin-1                                                    | 12 | 0.78 | -1.28 |   |
| Q920E5     | FDPS       | Farnesyl pyrophosphate synthase                                | 9  | 1.37 | 1.37  |   |
| Q9QXC1     | FETUB      | Fetuin-B                                                       | 10 | 0.63 | -1.58 |   |
| P30416     | FKBP4      | Peptidyl-prolyl cis-trans isomerase FKBP4                      | 10 | 1.54 | 1.54  | X |
| Q9JJ28     | FLII       | Protein flightless-1 homolog                                   | 11 | 1.30 | 1.30  |   |
| Q61598     | GDI2       | Rab GDP dissociation inhibitor beta                            | 25 | 1.30 | 1.30  | X |
| Q9CPU0     | GLO1       | Lactoylglutathione lyase                                       | 6  | 1.33 | 1.33  |   |
| Q9CPV4     | GLOD4      | Glyoxalase domain-containing protein 4                         | 11 | 1.34 | 1.34  | X |
| Q64521     | GPD2       | Glycerol-3-phosphate dehydrogenase                             | 18 | 1.24 | 1.24  |   |
| P19157     | GSTP1      | Glutathione S-transferase P 1                                  | 5  | 2.02 | 2.02  |   |
| Q9D3B1     | HACD2      | Very-long-chain (3R)-3-hydroxyacyl-CoA dehydratase 2           | 3  | 1.36 | 1.36  |   |
| Q8CBB6     | HIST1H2B Q | Histone H2B                                                    | 7  | 0.56 | -1.78 |   |
| P00493     | HPRT1      | Hypoxanthine-guanine phosphoribosyltransferase                 | 7  | 1.45 | 1.45  | X |
| Q3U816     | HTATIP2    | Oxidoreductase HTATIP2                                         | 3  | 1.51 | 1.51  |   |
| P58044     | IDI1       | Isopentenyl-diphosphate Delta-isomerase 1                      | 5  | 2.43 | 2.43  |   |
| A0A0B4J1H9 | IGKV1-132  | Immunoglobulin kappa variable 1-132                            | 3  | 0.50 | -2.00 |   |
| Q8BKC5     | IPO5       | Importin-5                                                     | 18 | 1.26 | 1.26  |   |
| Q9JKF1     | IQGAP1     | Ras GTPase-activating-like protein IQGAP1                      | 57 | 1.22 | 1.22  |   |
| O35344     | KPNA3      | Importin subunit alpha-4                                       | 4  | 1.42 | 1.42  |   |
| P70168     | KPNB1      | Importin subunit beta-1                                        | 22 | 1.21 | 1.21  |   |
| Q91XL1     | LRG1       | Leucine-rich HEV glycoprotein                                  | 6  | 0.60 | -1.65 |   |
| Q9DB27     | MCTS1      | Malignant T-cell-amplified sequence 1                          | 3  | 1.31 | 1.31  | X |
| Q6ZQI3     | MLEC       | Malectin                                                       | 9  | 1.37 | 1.37  |   |
| P62774     | MTPN       | Myotrophin                                                     | 4  | 2.00 | 2.00  |   |
| Q99JF5     | MVD        | Diphosphomevalonate decarboxylase                              | 3  | 1.47 | 1.47  | X |
| Q9R008     | MVK        | Mevalonate kinase                                              | 7  | 1.31 | 1.31  |   |
| Q6ZWQ9     | MYL12A     | Myosin regulatory light chain 12B                              | 9  | 1.37 | 1.37  |   |
| Q9CZ42     | NAXD       | ATP-dependent (S)-NAD(P)H-hydrate dehydratase                  | 7  | 0.78 | -1.28 |   |
| P15532     | NME1       | Nucleoside diphosphate kinase A                                | 3  | 1.22 | 1.22  |   |
| Q01768     | NME2       | Nucleoside diphosphate kinase                                  | 6  | 1.70 | 1.70  |   |
| Q9R1J0     | NSDHL      | Sterol-4-alpha-carboxylate 3-dehydrogenase, decarboxylating    | 6  | 1.25 | 1.25  |   |
| E9Q7G0     | NUMA1      | Nuclear mitotic apparatus protein 1                            | 19 | 1.31 | 1.31  |   |
| P29758     | OAT        | Ornithine aminotransferase, mitochondrial                      | 7  | 1.35 | 1.35  |   |
| Q9CZ30     | OLA1       | Obg-like ATPase 1                                              | 13 | 1.23 | 1.23  | X |
| Q62422     | OSTF1      | Osteoclast-stimulating factor 1                                | 3  | 1.87 | 1.87  |   |
| P09103     | P4HB       | Protein disulfide-isomerase                                    | 33 | 1.57 | 1.57  |   |
| P50580     | PA2G4      | Proliferation-associated protein 2G4                           | 21 | 1.30 | 1.30  |   |
| Q6PHQ9     | PABPC4     | Polyadenylate-binding protein                                  | 8  | 1.25 | 1.25  |   |
| Q9DBJ1     | PGAM1      | Phosphoglycerate mutase 1                                      | 6  | 2.36 | 2.36  |   |
| P53810     | PITPNA     | Phosphatidylinositol transfer protein alpha isoform            | 7  | 1.56 | 1.56  |   |
| Q60963     | PLA2G7     | Platelet-activating factor acetylhydrolase                     | 6  | 0.71 | -1.40 |   |



|        |           |                                                                                   |    |      |       |   |
|--------|-----------|-----------------------------------------------------------------------------------|----|------|-------|---|
| P43883 | PLIN2     | Perilipin-2                                                                       | 5  | 1.58 | 1.58  |   |
| Q9DBG5 | PLIN3     | Perilipin-3                                                                       | 11 | 1.23 | 1.23  |   |
| Q9R0E2 | PLOD1     | Procollagen-lysine,2-oxoglutarate 5-dioxygenase 1                                 | 6  | 0.69 | -1.44 |   |
| Q99K51 | PLS3      | Plastin-3                                                                         | 20 | 1.65 | 1.65  |   |
| Q9D819 | PPA1      | Inorganic pyrophosphatase                                                         | 14 | 1.34 | 1.34  |   |
| Q9R269 | PPL       | Periplakin                                                                        | 10 | 1.47 | 1.47  | X |
| P62141 | PPP1CB    | Serine/threonine-protein phosphatase PP1-beta catalytic subunit                   | 3  | 1.28 | 1.28  | X |
| Q76MZ3 | PPP2R1A   | Serine/threonine-protein phosphatase 2A 65 kDa regulatory subunit A alpha isoform | 10 | 1.38 | 1.38  |   |
| P63328 | PPP3CA    | Serine/threonine-protein phosphatase 2B catalytic subunit alpha isoform           | 4  | 1.74 | 1.74  |   |
| P99029 | PRDX5     | Peroxiredoxin-5, mitochondrial                                                    | 11 | 2.19 | 2.19  |   |
| Q6GT24 | PRDX6     | Peroxiredoxin-6                                                                   | 14 | 1.39 | 1.39  |   |
| Q8BFQ1 | PSAP      | Prosaposin                                                                        | 6  | 0.68 | -1.47 |   |
| Q99LS3 | PSPH      | Phosphoserine phosphatase                                                         | 3  | 1.92 | 1.92  | X |
| Q9EPB4 | PYCARD    | Apoptosis-associated speck-like protein containing a CARD                         | 6  | 3.29 | 3.29  |   |
| Q8BVI4 | QDPR      | Dihydropteridine reductase                                                        | 4  | 1.39 | 1.39  | X |
| P61027 | RAB10     | Ras-related protein Rab-10                                                        | 6  | 1.57 | 1.57  |   |
| P46638 | RAB11B    | Ras-related protein Rab-11B;Ras-related protein Rab-11A                           | 9  | 1.65 | 1.65  | X |
| Q91V41 | RAB14     | Ras-related protein Rab-14                                                        | 9  | 1.21 | 1.21  |   |
| P53994 | RAB2A     | Ras-related protein Rab-2A                                                        | 8  | 1.23 | 1.23  | X |
| Q3TXV4 | RAB31     | Ras-related protein Rab-31                                                        | 3  | 1.84 | 1.84  | X |
| Q6PHN9 | RAB35     | Ras-related protein Rab-35                                                        | 4  | 1.35 | 1.35  |   |
| P35276 | RAB3D     | Ras-related protein Rab-3D                                                        | 3  | 1.55 | 1.55  |   |
| P61021 | RAB5B     | Ras-related protein Rab-5B                                                        | 3  | 1.52 | 1.52  |   |
| Q8C266 | RAB5C     | Ras-related protein Rab-5C                                                        | 6  | 1.25 | 1.25  |   |
| P35279 | RAB6A     | Ras-related protein Rab-6A;Ras-related protein Rab-6B                             | 8  | 1.29 | 1.29  |   |
| P51150 | RAB7A     | Ras-related protein Rab-7a                                                        | 12 | 1.32 | 1.32  |   |
| P55258 | RAB8A     | Ras-related protein Rab-8A                                                        | 5  | 1.38 | 1.38  |   |
| Q91WG2 | RABEP2    | Rab GTPase-binding effector protein 2                                             | 5  | 1.23 | 1.23  |   |
| P62827 | RAN       | GTP-binding nuclear protein Ran                                                   | 12 | 1.25 | 1.25  |   |
| P46061 | RANGAP1   | Ran GTPase-activating protein 1                                                   | 11 | 1.30 | 1.30  |   |
| Q8BK67 | RCC2      | Protein RCC2                                                                      | 14 | 1.27 | 1.27  |   |
| Q9QUI0 | RHOA      | Transforming protein RhoA                                                         | 6  | 1.38 | 1.38  |   |
| O35292 | RNASE2B   | Ribonuclease 2B                                                                   | 4  | 0.46 | -2.18 |   |
| P53026 | RPL10A    | 60S ribosomal protein L10a                                                        | 7  | 1.28 | 1.28  |   |
| Q9CXW4 | RPL11     | 60S ribosomal protein L11                                                         | 8  | 1.21 | 1.21  |   |
| P47963 | RPL13     | 60S ribosomal protein L13                                                         | 9  | 1.21 | 1.21  |   |
| Q5M8M8 | RPL29     | 60S ribosomal protein L29                                                         | 7  | 0.80 | -1.25 |   |
| Q921R2 | RPS13     | 40S ribosomal protein S13                                                         | 7  | 1.53 | 1.53  |   |
| P62245 | RPS15A    | 40S ribosomal protein S15a                                                        | 8  | 1.42 | 1.42  |   |
| Q9CQR2 | RPS21     | 40S ribosomal protein S21                                                         | 5  | 1.30 | 1.30  |   |
| P62852 | RPS25     | 40S ribosomal protein S25                                                         | 4  | 0.54 | -1.86 |   |
| P50543 | S100A11   | Protein S100-A11                                                                  | 3  | 1.32 | 1.32  |   |
| Q99JZ4 | SAR1A     | GTP-binding protein SAR1a                                                         | 8  | 1.54 | 1.54  |   |
| Q8BH69 | SEPHS1    | Selenide, water dikinase 1                                                        | 3  | 1.24 | 1.24  |   |
| Q8R121 | SERPINA10 | Protein Z-dependent protease inhibitor                                            | 6  | 0.69 | -1.44 |   |
| P70124 | SERPINB5  | Serpin B5                                                                         | 21 | 1.45 | 1.45  | X |
| Q6P6K7 | SERPINB6C | Serpinb6c protein                                                                 | 7  | 1.50 | 1.50  |   |
| O08800 | SERPINB8  | Serpin B8                                                                         | 6  | 1.23 | 1.23  |   |

|        |          |                                                     |    |      |       |   |
|--------|----------|-----------------------------------------------------|----|------|-------|---|
| Q91VW3 | SH3BGR13 | SH3 domain-binding glutamic acid-rich-like protein3 | 4  | 3.38 | 3.38  |   |
| P50431 | SHMT1    | Serine hydroxymethyltransferase, cytosolic          | 12 | 1.36 | 1.36  |   |
| P57787 | SLC16A3  | Monocarboxylate transporter 4                       | 3  | 1.28 | 1.28  |   |
| Q8VEM8 | SLC25A3  | Phosphate carrier protein, mitochondrial            | 13 | 1.31 | 1.31  |   |
| Q9Z0F7 | SNCG     | Gamma-synuclein                                     | 3  | 1.86 | 1.86  |   |
| Q6NZD2 | SNX1     | Sorting nexin-1                                     | 6  | 1.22 | 1.22  |   |
| Q9CWK8 | SNX2     | Sorting nexin-2                                     | 15 | 1.26 | 1.26  |   |
| Q9D8U8 | SNX5     | Sorting nexin-5                                     | 4  | 1.47 | 1.47  |   |
| Q6P8X1 | SNX6     | Sorting nexin-6                                     | 5  | 1.30 | 1.30  |   |
| P16546 | SPTAN1   | Spectrin alpha chain, non-erythrocytic 1            | 20 | 1.29 | 1.29  |   |
| Q6P069 | SRI      | Sorcin                                              | 6  | 1.33 | 1.33  |   |
| Q64674 | SRM      | Spermidine synthase                                 | 7  | 1.20 | 1.20  |   |
| Q8BL97 | SRSF7    | Serine/arginine-rich splicing factor 7              | 4  | 0.73 | -1.37 |   |
| Q497J0 | STFA1    | Stefin-1                                            | 7  | 1.37 | 1.37  |   |
| P35173 | STFA3    | Stefin-3                                            | 7  | 1.69 | 1.69  |   |
| Q80X82 | SYMPK    | Symplekin                                           | 3  | 1.35 | 1.35  |   |
| Q9WVA4 | TAGLN2   | Transgelin-2                                        | 9  | 1.42 | 1.42  |   |
| Q93092 | TALDO1   | Transaldolase                                       | 15 | 1.52 | 1.52  |   |
| Q9D1E6 | TBCB     | Tubulin-folding cofactor B                          | 7  | 1.23 | 1.23  |   |
| Q9JHF5 | TCIRG1   | V-type proton ATPase subunit a                      | 5  | 0.77 | -1.31 |   |
| P01831 | THY1     | Thy-1 membrane glycoprotein                         | 3  | 0.81 | -1.24 |   |
| Q8BH58 | TIPRL    | TIP41-like protein                                  | 3  | 1.40 | 1.40  | X |
| P40142 | TKT      | Transketolase                                       | 27 | 1.22 | 1.22  |   |
| P26039 | TLN1     | Talin-1                                             | 88 | 1.27 | 1.27  |   |
| Q9D1D4 | TMED10   | Transmembrane emp24 domain-containing protein10     | 5  | 1.67 | 1.67  |   |
| Q8BXN9 | TMEM87A  | Transmembrane protein 87A                           | 6  | 1.20 | 1.20  |   |
| Q8BFY9 | TNPO1    | Transportin-1                                       | 10 | 1.29 | 1.29  |   |
| P17751 | TPI1     | Triosephosphate isomerase                           | 19 | 1.40 | 1.40  |   |
| Q7M739 | TPR      | Nucleoprotein TPR                                   | 6  | 1.21 | 1.21  | X |
| P63028 | TPT1     | Translationally-controlled tumor protein            | 9  | 1.31 | 1.31  |   |
| E9PY51 | TRAPPC8  | Trafficking protein particle complex 8              | 3  | 1.40 | 1.40  |   |
| P10639 | TXN      | Thioredoxin                                         | 7  | 1.41 | 1.41  |   |
| Q3KQM4 | U2AF2    | Splicing factor U2AF 65 kDa subunit                 | 5  | 1.37 | 1.37  |   |
| Q9CRB3 | URAH     | 5-hydroxyisourate hydrolase                         | 5  | 1.28 | 1.28  |   |
| E9Q6R7 | UTRN     | Utrophin                                            | 4  | 0.72 | -1.39 |   |
| Q64727 | VCL      | Vinculin                                            | 40 | 1.68 | 1.68  |   |
| Q9QZ88 | VPS29    | Vacuolar protein sorting-associated protein 29      | 4  | 1.49 | 1.49  | X |
| Q00519 | XDH      | Xanthine dehydrogenase/oxidase                      | 40 | 1.21 | 1.21  |   |
| Q3UE92 | XPNPEP1  | Xaa-Pro aminopeptidase 1                            | 18 | 1.23 | 1.23  |   |
| Q9CQW1 | YKT6     | Synaptobrevin homolog YKT6                          | 7  | 1.62 | 1.62  | X |
